# Supplementary material for: Epidermal growth factor receptor signaling protects epithelia from morphogenetic instability and tissue damage in Drosophila
Source: PubMed Central journal article supplement (PMC10108703; doi:10.1242/dev.201231), 2023-03-09
Supplement: develop-150-201231-s1.pdf [file develop-150-201231-s1.pdf]

Supplementary Figure S1.

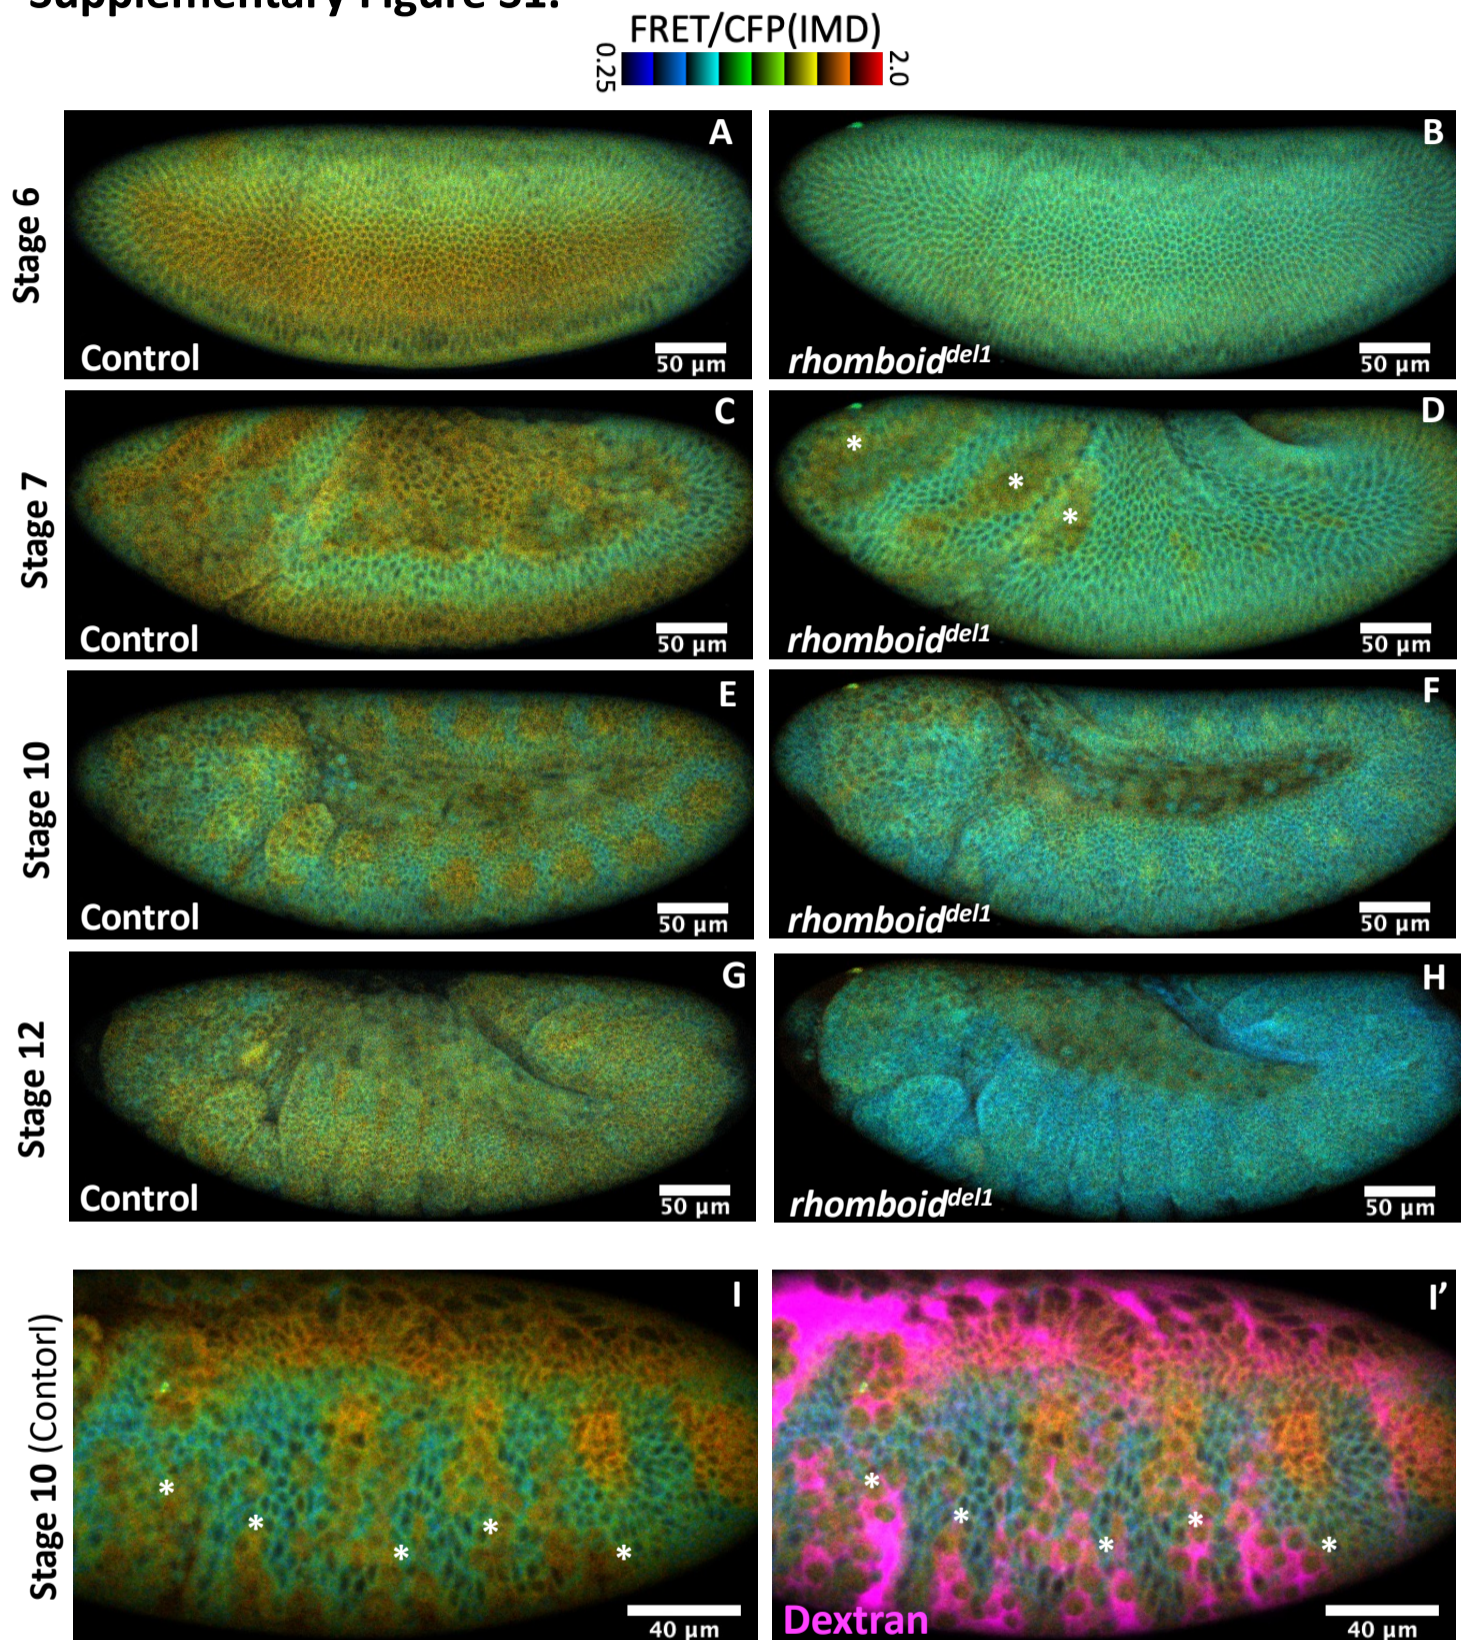

**Fig. S1. ERK-FRET images during embryogenesis.** Control embryos (A,C,E,G). Rhomboid mutant (B,D,F,H) embryos. The asterisk indicates a mitotic cell cluster with high FRET signal reflecting the CDK1 activity independent of rhomboid. (D). Asterisks indicate mitotic cells with FRET activity induced by Cdk1. I, I'. ERK-FRET image (I) and an overlay of perivitelline dye (I') in stage 10 embryos. Asterisks indicate mitotic cell clusters that detach from the vitelline membrane.

## Supplementary Figure S2.

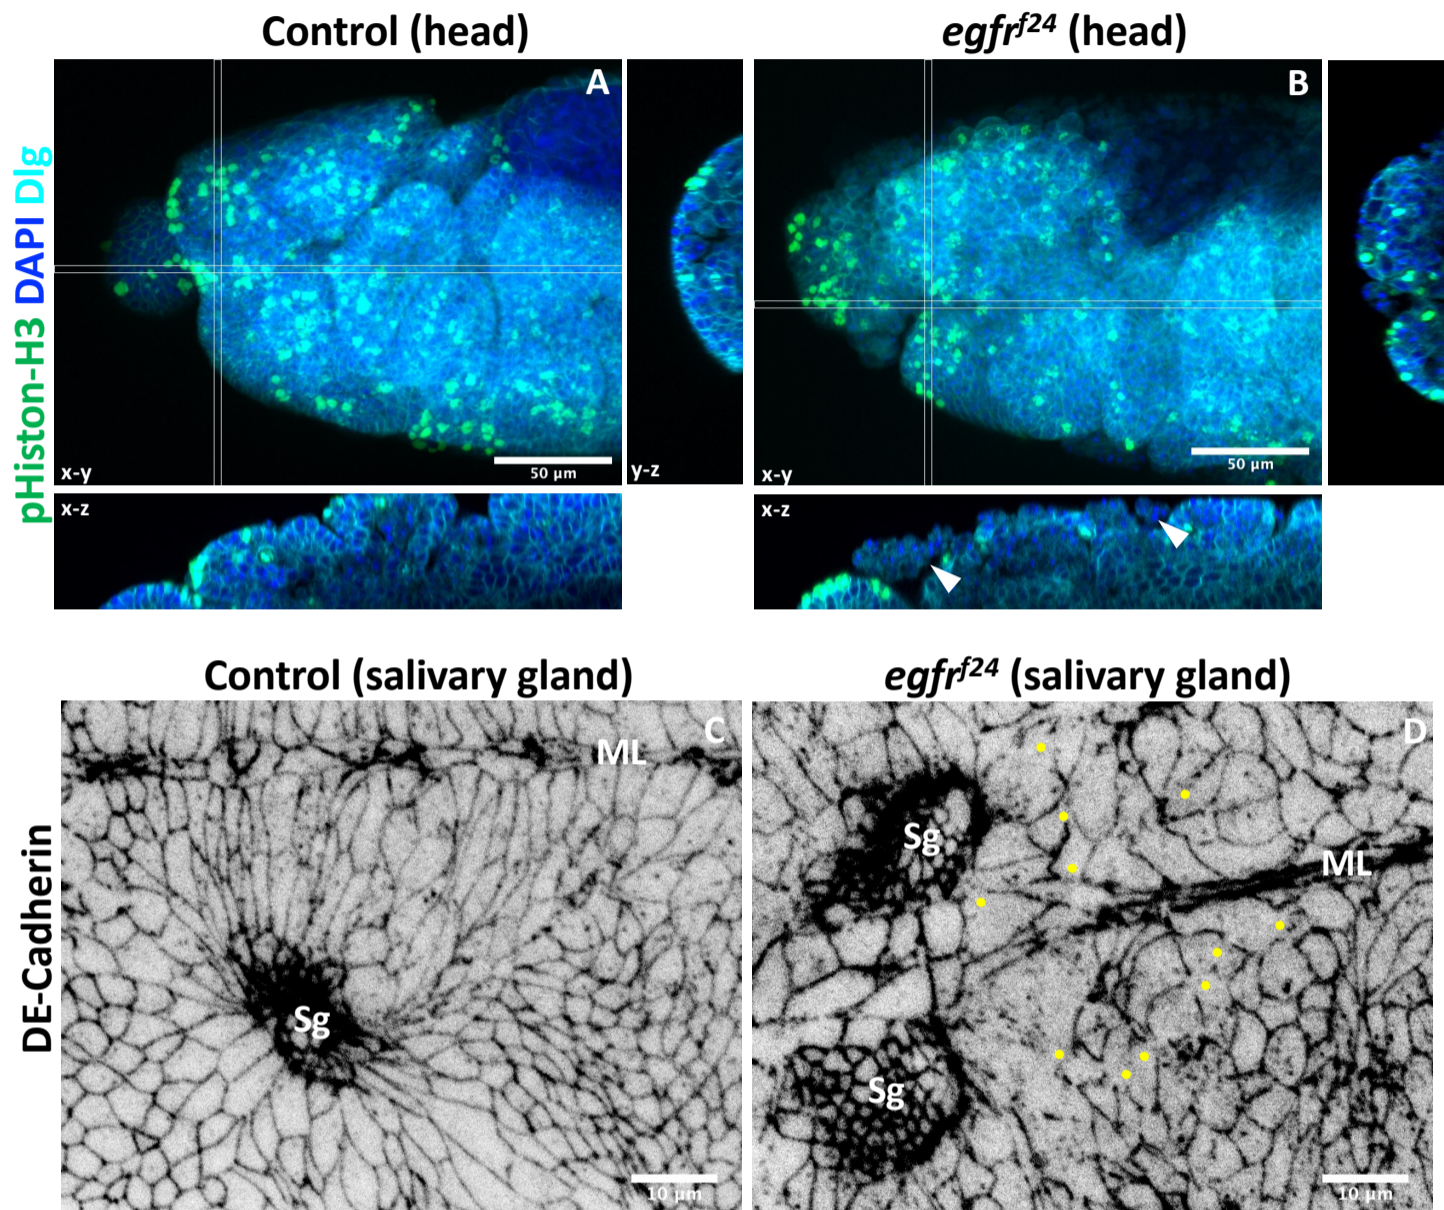

**Fig. S2. Patterns of mitotic cells and E-cadherin localization.**

A, B. Mitotic cell marker phosphorylated histone H3 staining of control (A) and EGFR mutant (B) cells in the head. Closed arrowhead indicate the cluster of apically extruded cells. C, D. E-cadherin localization around the invagination site of the salivary gland. Control embryo (C). EGFR mutant embryo (D). Yellow dot shows the gaps of the junctional E-cadherin localization. N=4 for each genotype. ML: ventral midline.

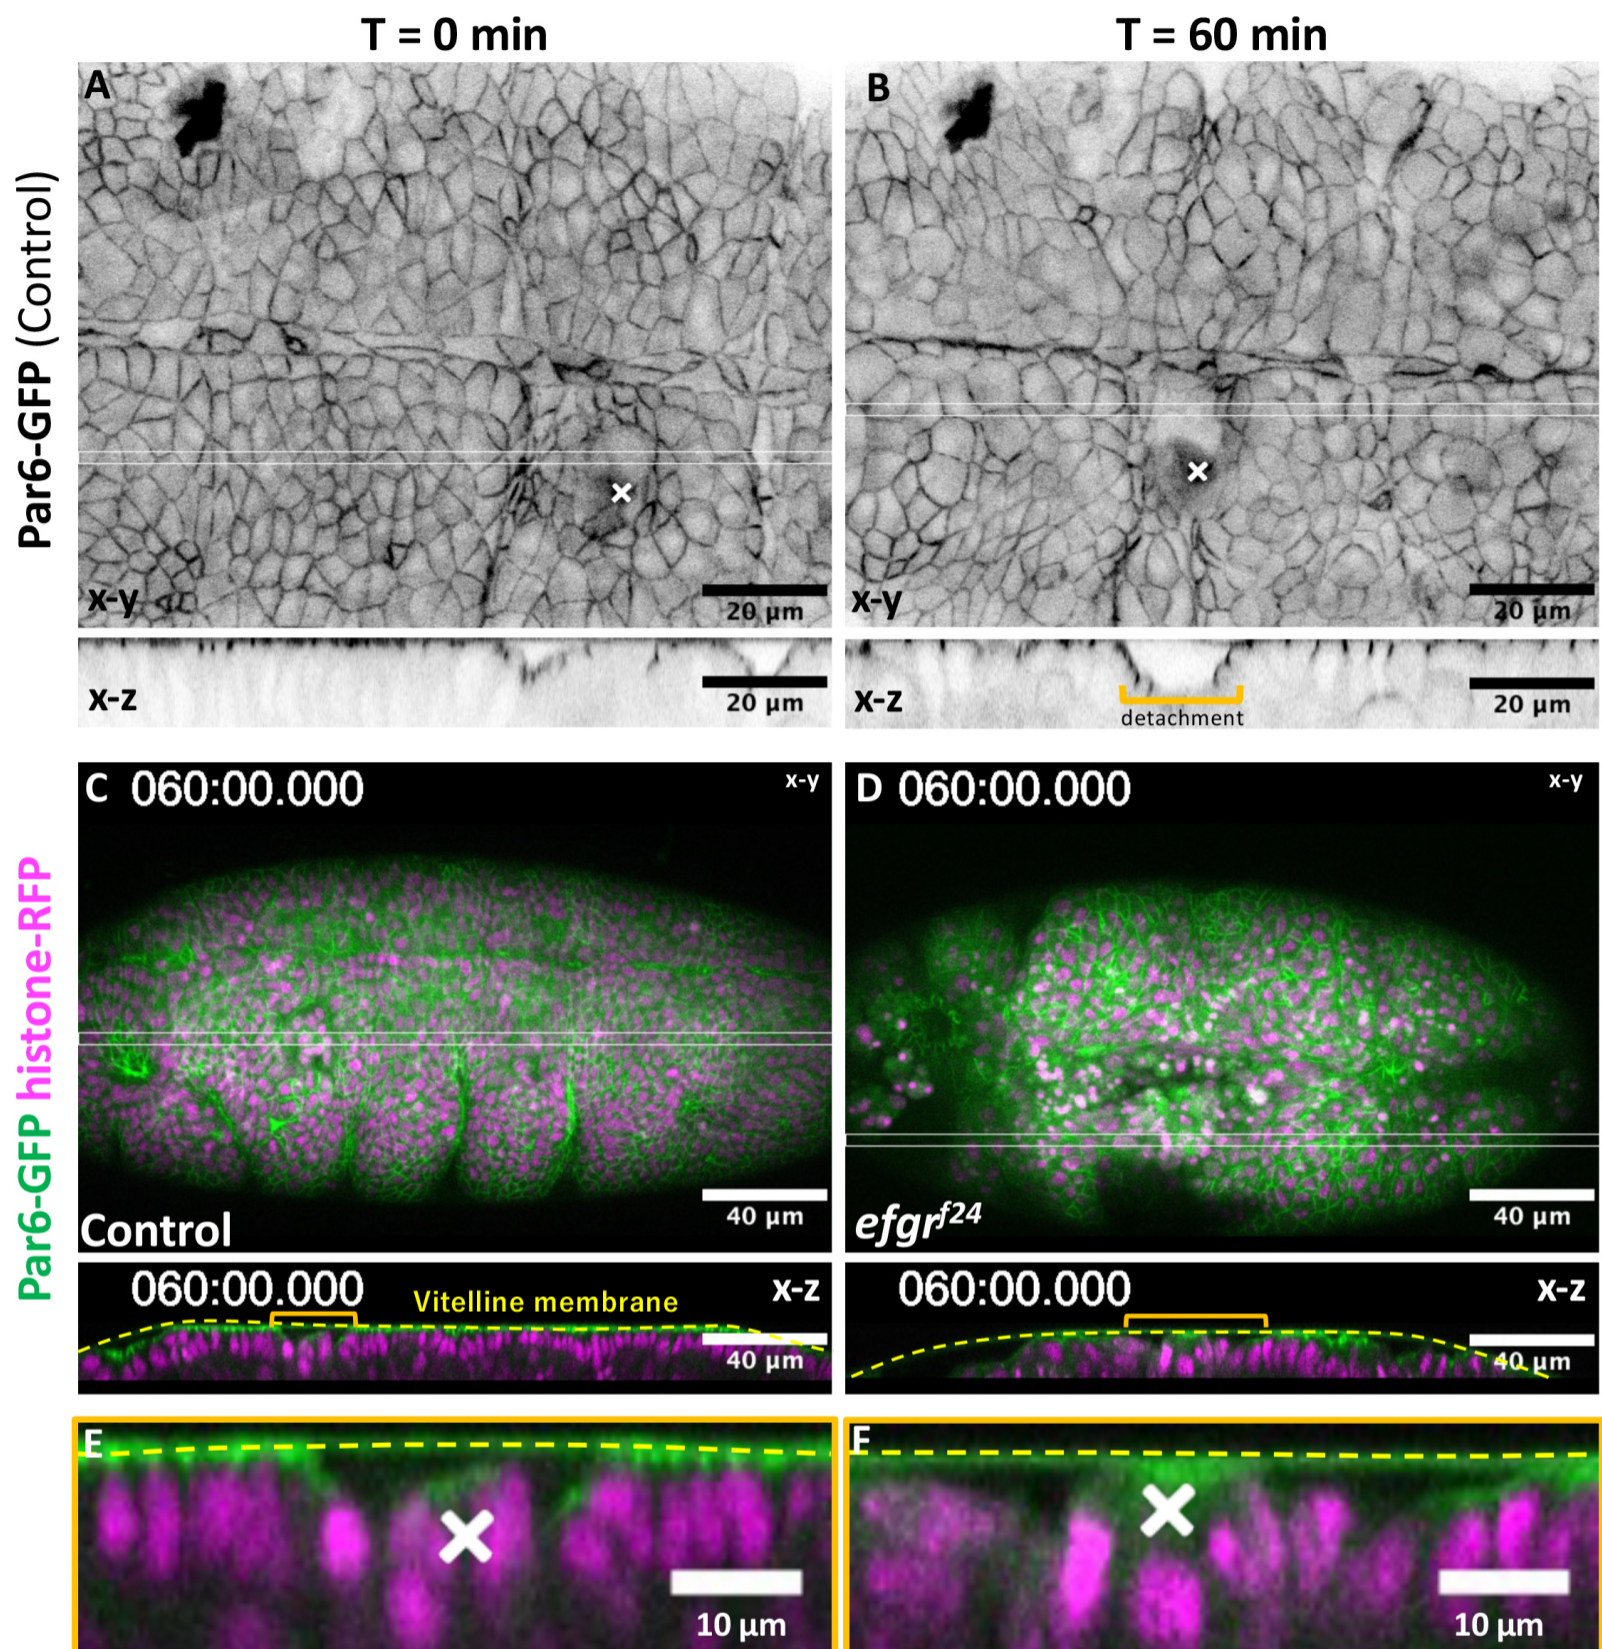

**Fig. S3. Detachment of epidermis from the vitelline membrane by wounding.**

A, B. X-Y and X-Z sections of the region near the wound site. The x-z section of the double horizontal line is shown. A. Immediately after laser wounding. The cells were attached to the vitelline membrane. B. 60 min later, a large gap appeared. The gap was observed 5 min after wounding and gradually increased in size. C-F. Cross-sectional views of wounded regions of the control (C, E) and EGFR mutant (D, F) 60 min after wounding. Note in enlarged views (E, F) that apical Par6-GFP was maintained in the control (E), but lost in the mutant (F). Related to Figs 6 E, F, and movie S7. Cross marks; wounded site.

**Table S1.** Key resource table

[Click here to download Table S1](#)

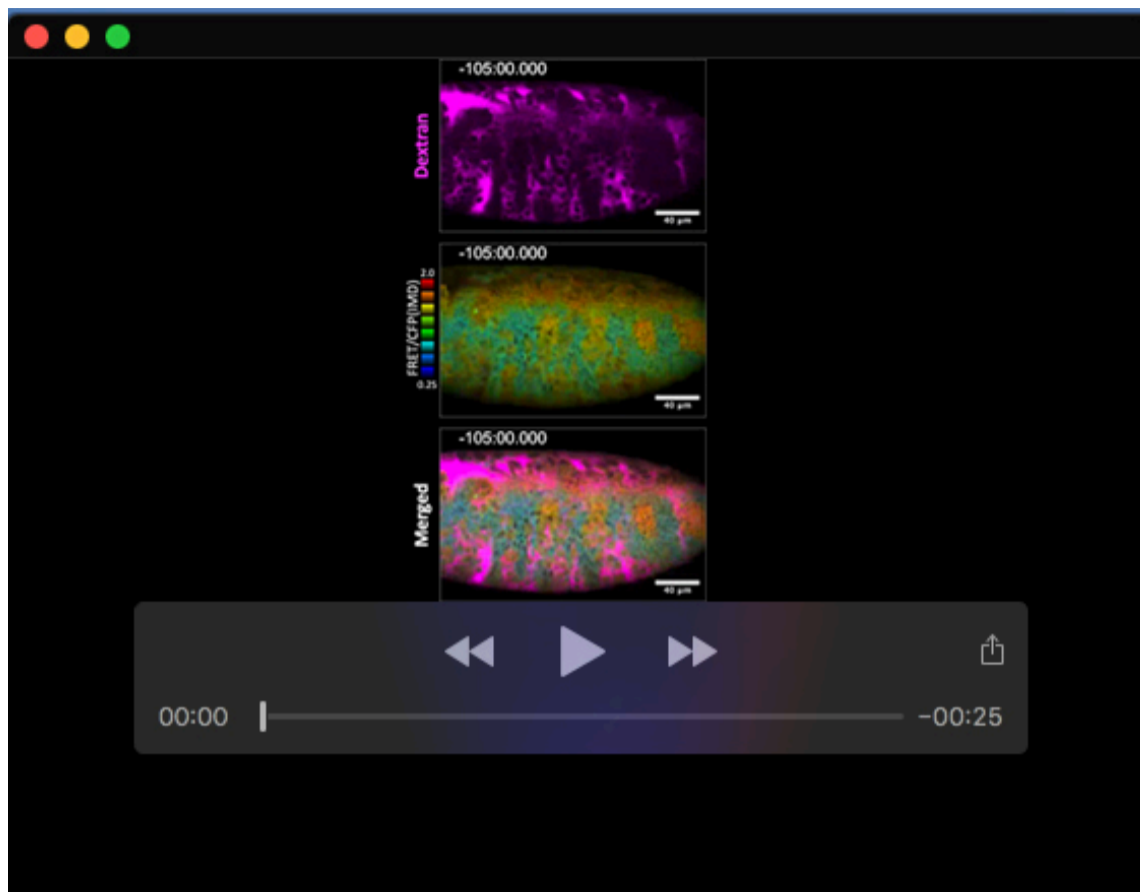

**Movie 1.** ERK-FRET imaging of embryos injected with a fluorescent tracer (rhodamine dextran) in the perivitelline space. Related to Fig. 1D-G. Time ( $t$ ) = 0 was set at the time of tracheal invagination of T1 segment.

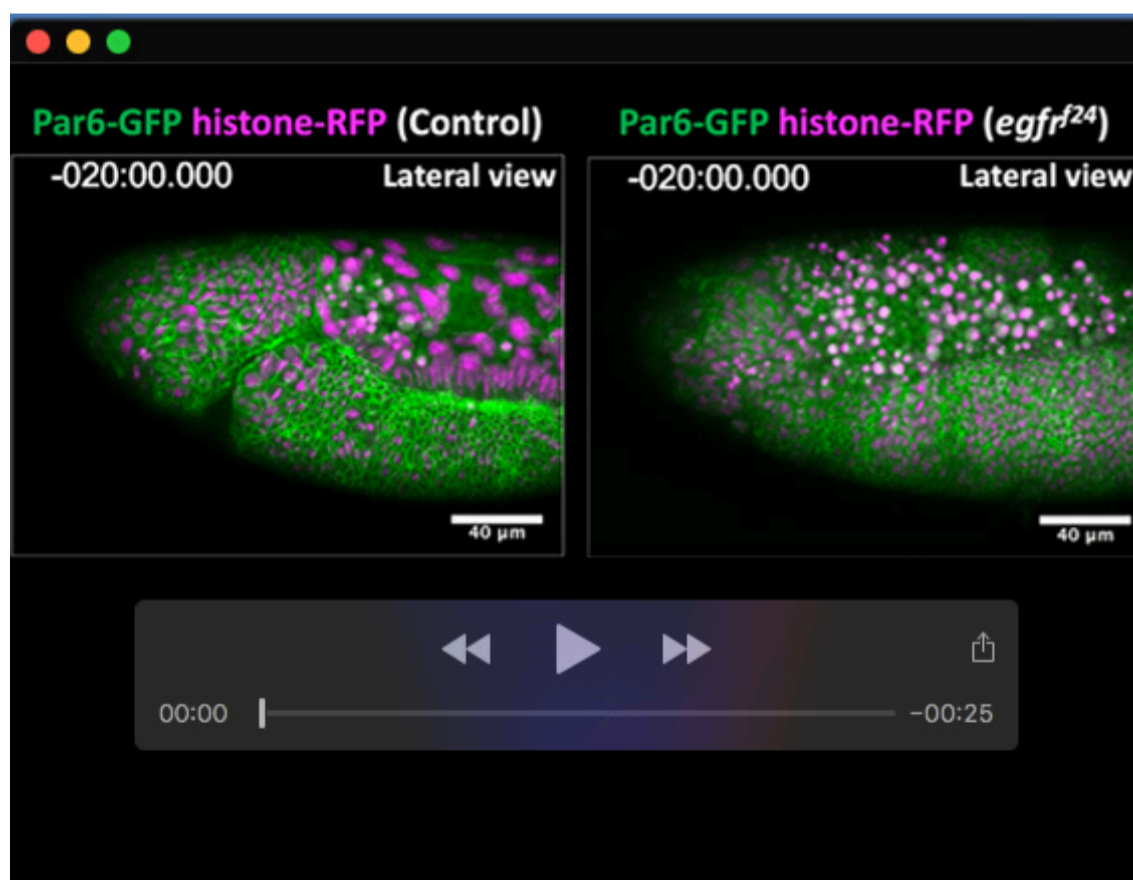

**Movie 2.** Tissue collapse phenotype of the EGFR mutant. Imaging was started in the late stage 10. Time  $t = 0$  was set at the time of full opening of the tracheal pit at T2. Related to Fig. 2D, E.

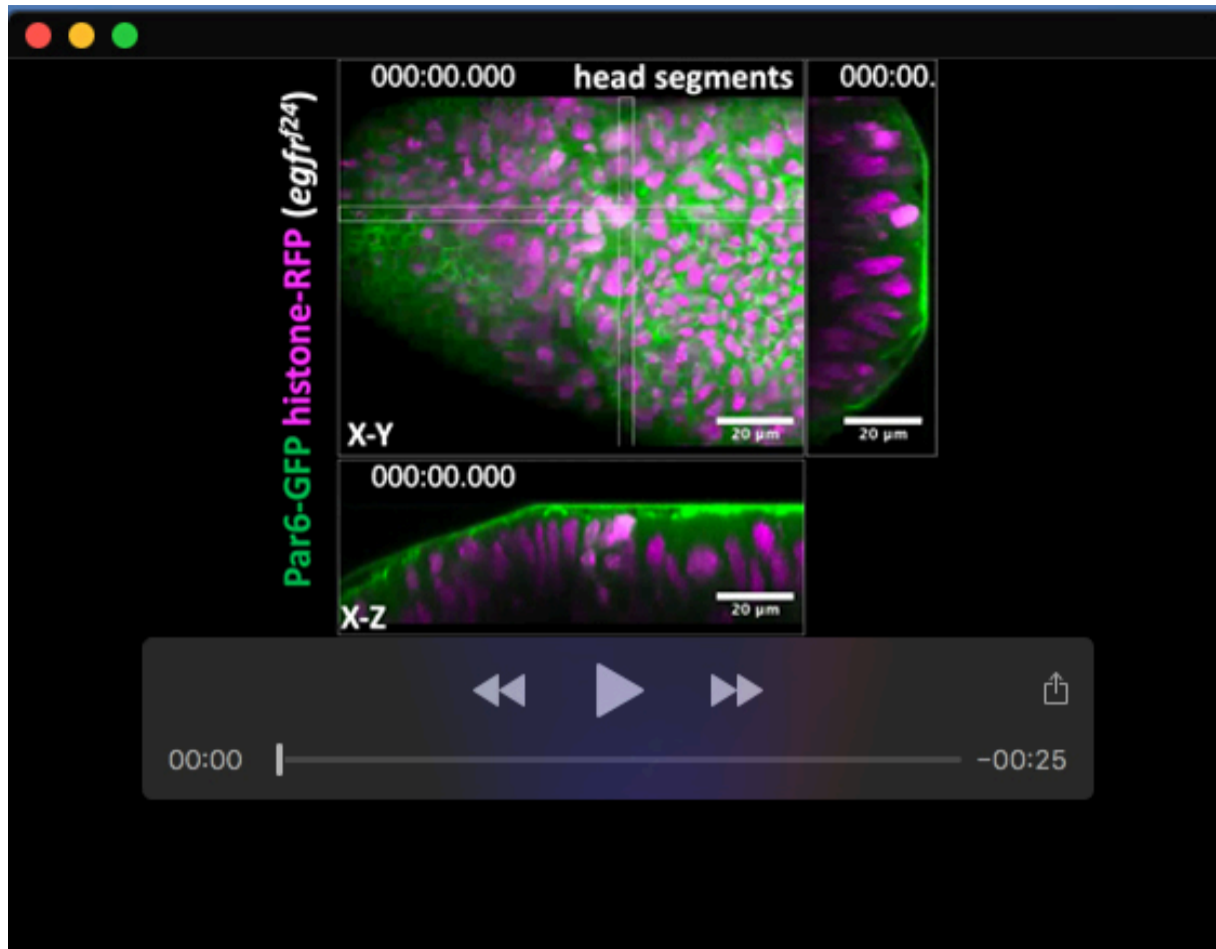

**Movie 3.** Apical cell extrusion in the EGFR mutant head. The time to the first apically extruded cell was set as  $t = 0$ . This cell was tracked by adjusting the positions of the x-z and y-z slices. Related to Fig. 3G.

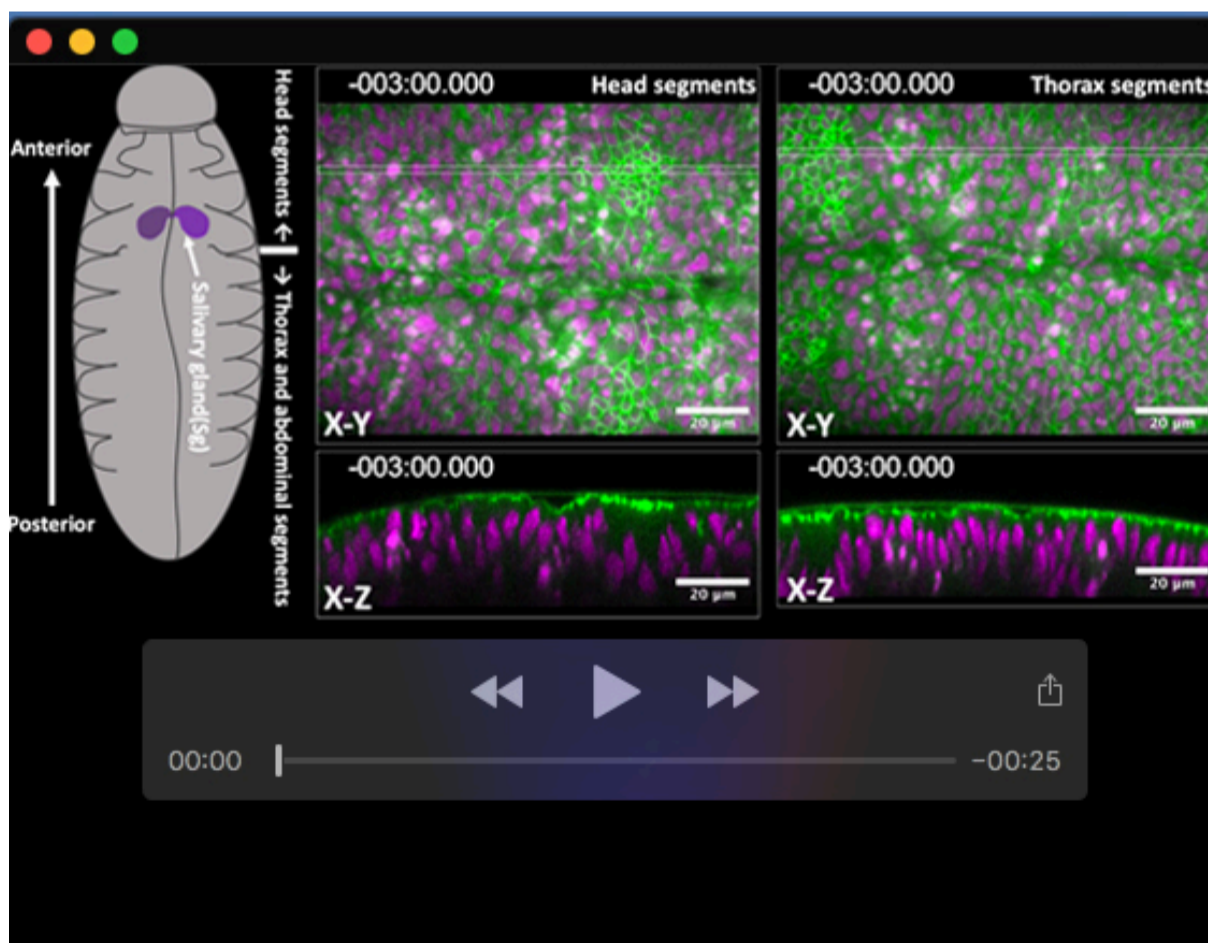

**Movie 4.** Apical cell extrusion at the salivary gland invagination site of EGFR mutants. Ventral views of the head and thoracic regions of the two embryos were obtained. Time  $t = 0$  was set at the beginning of invagination. Related to Fig. 4F, G.

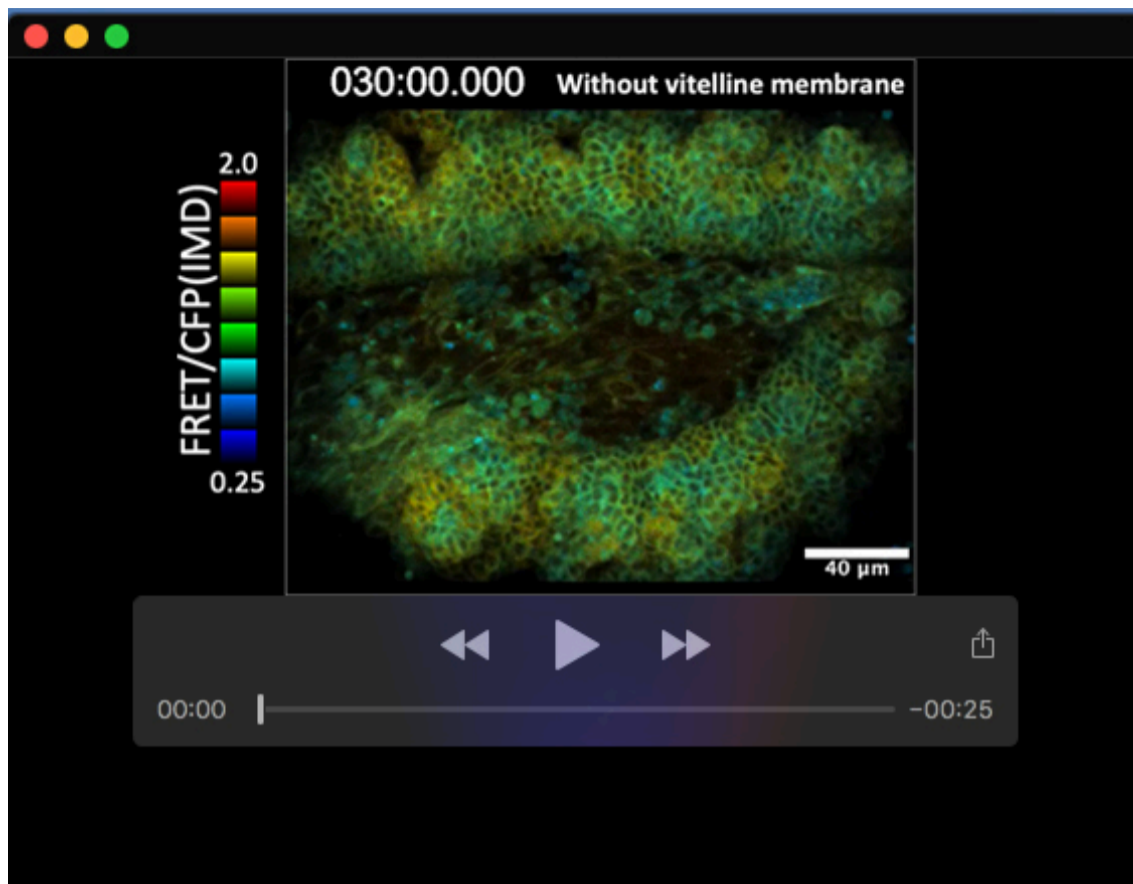

**Movie 5.** ERK FRET activity in a tissue explant from stage 11 embryo. The FRET activity in the tracheal invagination site was maintained after devitellinization. Related to Fig. 5E.

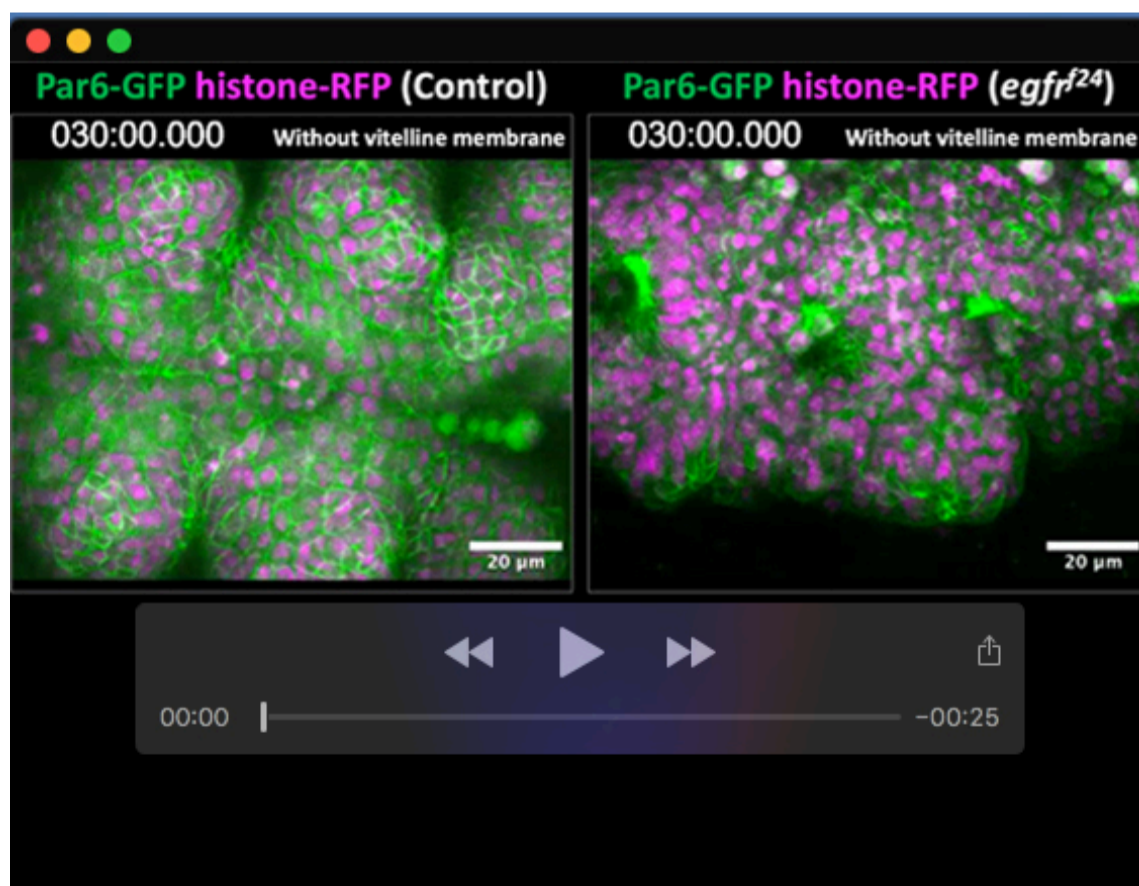

**Movie 6.** Tissue explant experiment. Tissue fragments of the control and EGFR mutant, removed from the vitelline membrane, and cultured *in vitro*, were imaged. Related to Fig. 5G.

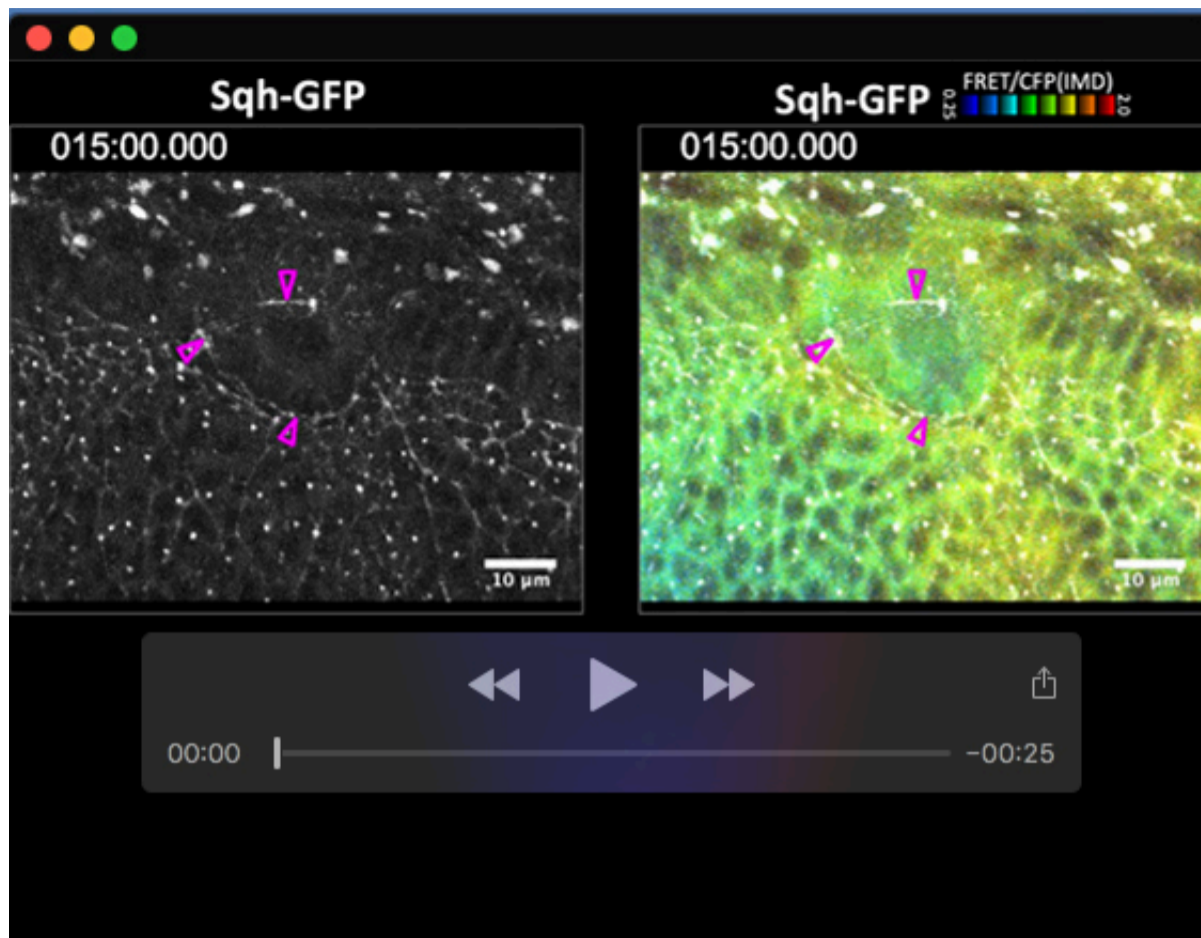

**Movie 7.** Responses of myosin (myosin light chain GFP) and ERK signaling (ERK-FRET) to laser-induced wounding in control embryos. Related to Fig. 6D.

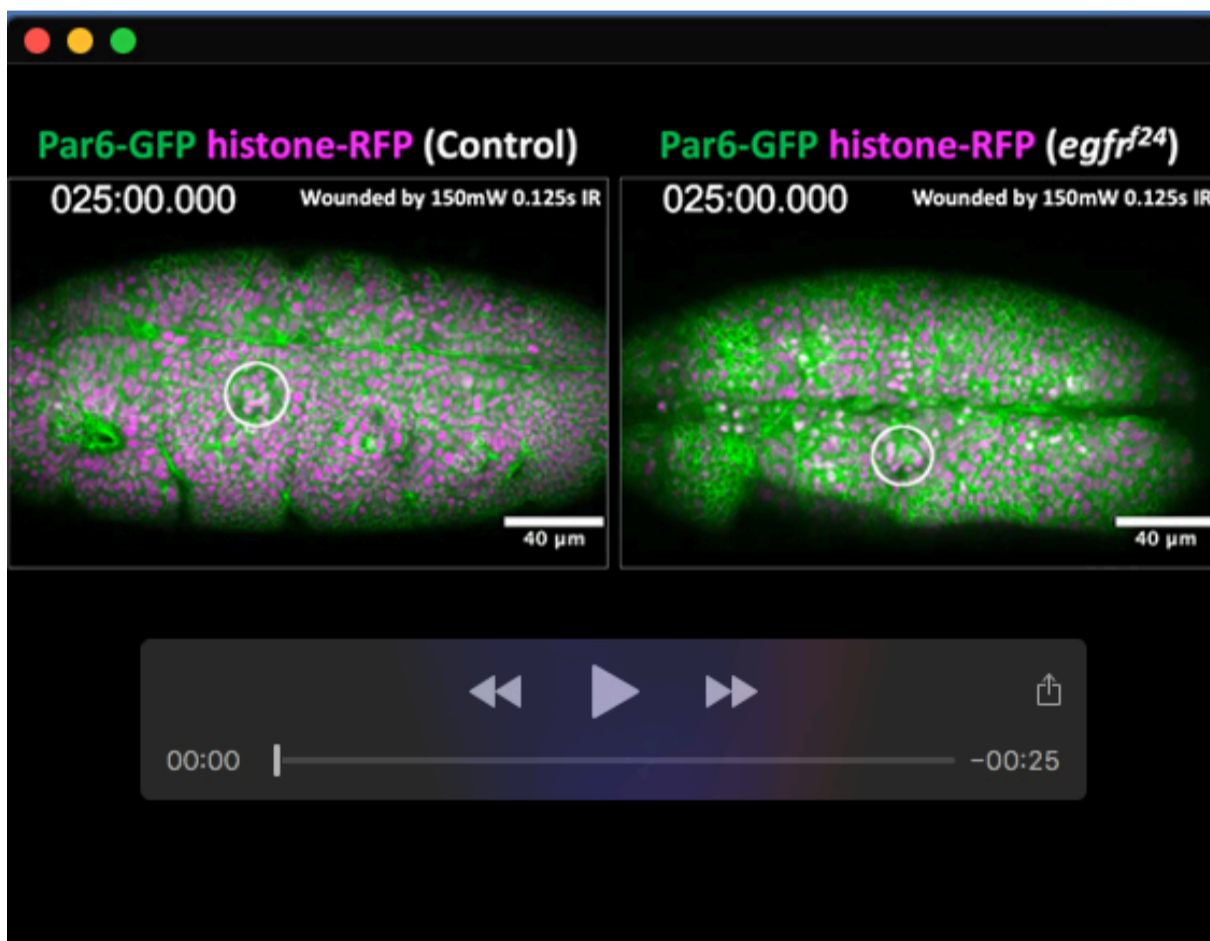

**Movie 8.** Laser-induced wounding in EGFR-mutant embryos. Embryos at stage 12 prior to tissue collapse in the thorax were chosen for the experiment. Related to Fig. 6E, F.

## References

- Bardet, P.-L., Kolahgar, G., Mynett, A., Miguel-Aliaga, I., Briscoe, J., Meier, P. and Vincent, J.-P.** (2008). A fluorescent reporter of caspase activity for live imaging. *Proc. Natl. Acad. Sci. USA* **105**, 13901-13905. doi:10.1073/pnas.0806983105
- Bier, E., Jan, L. Y., & Jan, Y. N.** (1990). rhomboid, a gene required for dorsoventral axis establishment and peripheral nervous system development in *Drosophila melanogaster*. *Genes Dev*, **4**, 190–203. doi: 10.1101/gad.4.2.190
- Clifford, R. J. and Schüpbach, T.** (1989). Coordinately and differentially mutable activities of torpedo, the *Drosophila melanogaster* homolog of the vertebrate EGF receptor gene. *Genetics* **123**, 771-787. doi:10.1093/genetics/123.4.771
- Kondo, T. and Hayashi, S.** (2013). Mitotic cell rounding accelerates epithelial invagination. *Nature* **494**, 125-129. doi:10.1038/nature11792
- Miao, G. and Hayashi, S.** (2015). Manipulation of gene expression by infrared laser heat shock and its application to the study of tracheal development in *Drosophila*. *Dev. Dyn.* **244**, 479-487. doi:10.1002/dvdy.24192
- Ogura, Y., Wen, F.-L., Sami, M. M., Shibata, T. and Hayashi, S.** (2018). A switch-like activation relay of EGFR-ERK signaling regulates a wave of cellular contractility for epithelial invagination. *Dev. Cell* **46**, 162-172.e5. doi:10.1016/j.devcel.2018.06.004
- Ogura, Y., Sami, M. M., Wada, H. and Hayashi, S.** (2019). Automated FRET quantification shows distinct subcellular ERK activation kinetics in response to graded EGFR signaling in *Drosophila*. *Genes Cells* **24**, 297-306. doi:10.1111/gtc.12679
- Uemura, T., Oda, H., Kraut, R., Hayashi, S., Kotaoka, Y. and Takeichi, M.** (1996). Zygotic *Drosophila* E-cadherin expression is required for processes of dynamic epithelial cell rearrangement in the *Drosophila* embryo. *Genes Dev.* **10**, 659-671. doi:10.1101/gad.10.6.659
- White, K., Grether, M. E., Abrams, J. M., Young, L., Farrell, K., & Steller, H.** (1994). Genetic Control of Programmed Cell Death in *Drosophila*. *Science*, **264**, 677–683. doi: 10.1126/science.8171319
- Wirtz-Peitz, F., Nishimura, T. and Knoblich, J. A.** (2008). Linking cell cycle to asymmetric division: aurora-a phosphorylates the par complex to regulate numb localization. *Cell* **135**, 161-173. doi:10.1016/j.cell.2008.07.049
